# Supplementary material
Source: PubMed Central journal article supplement (PMC4988899)

# Supplementary Figure 1

Figure 1c:

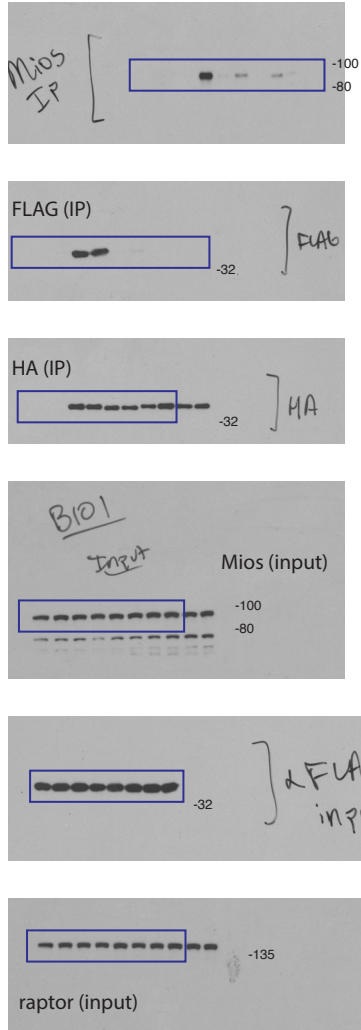

Figure 2d:

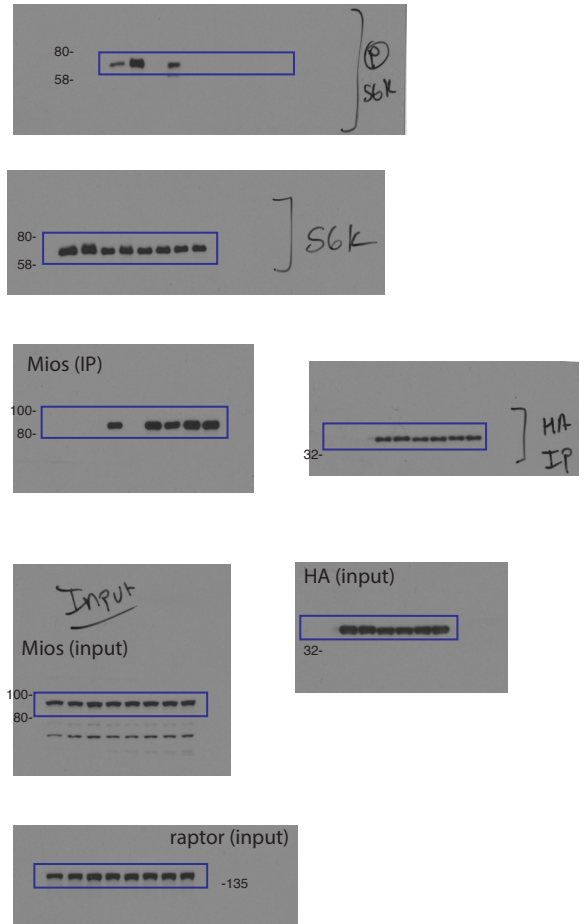

Figure 2e:

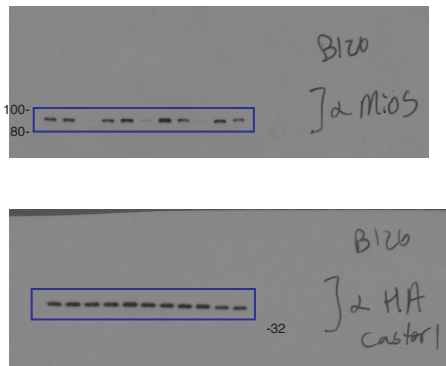

Figure 3c:

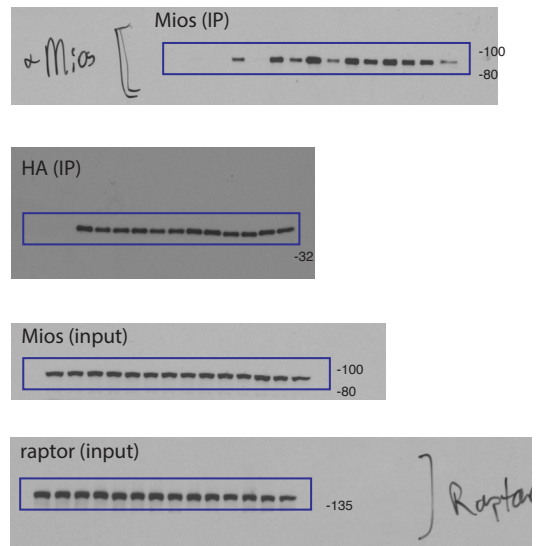

Figure 3d:

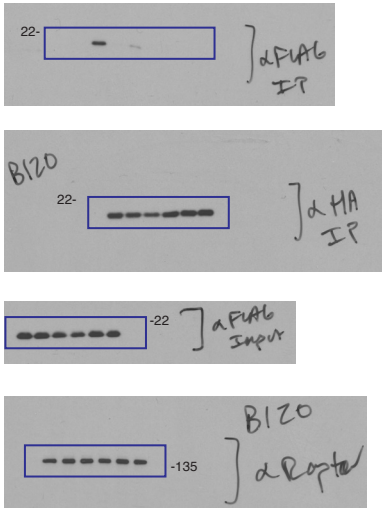

Figure 4a:

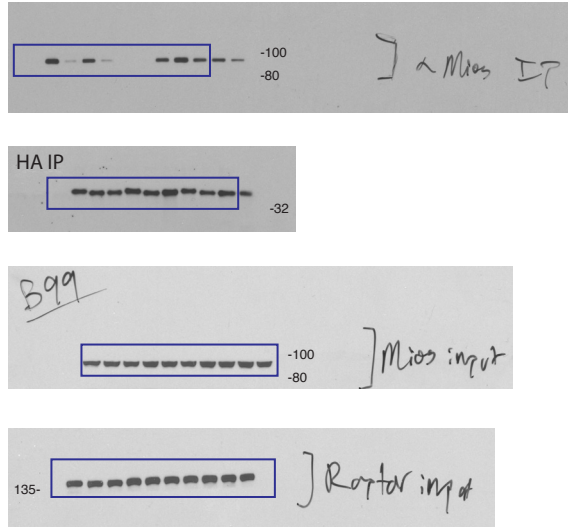

Figure 4d:

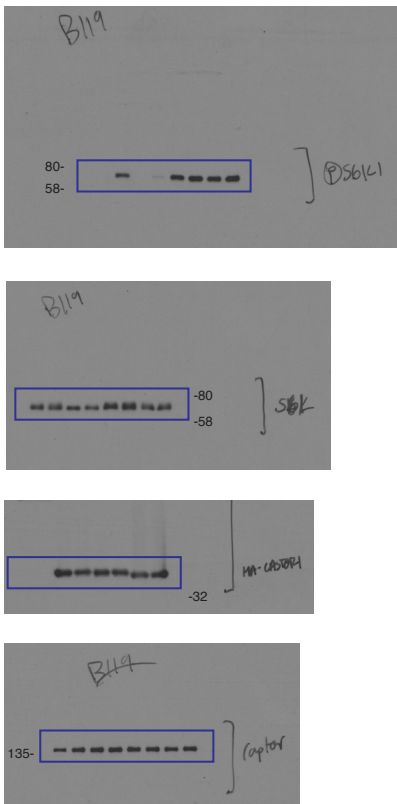

Extended Data Fig. 2b:

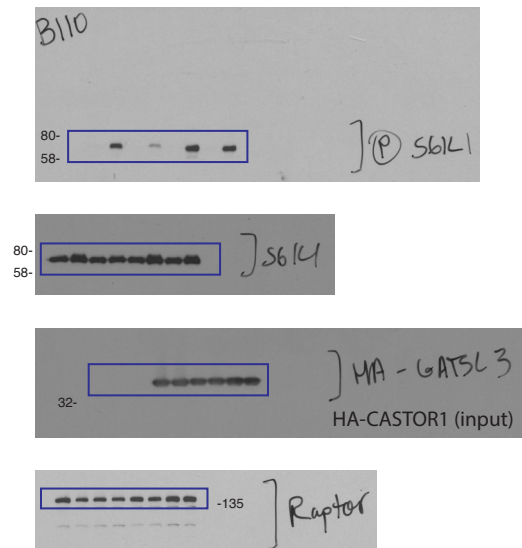

Extended Data Fig. 4b:

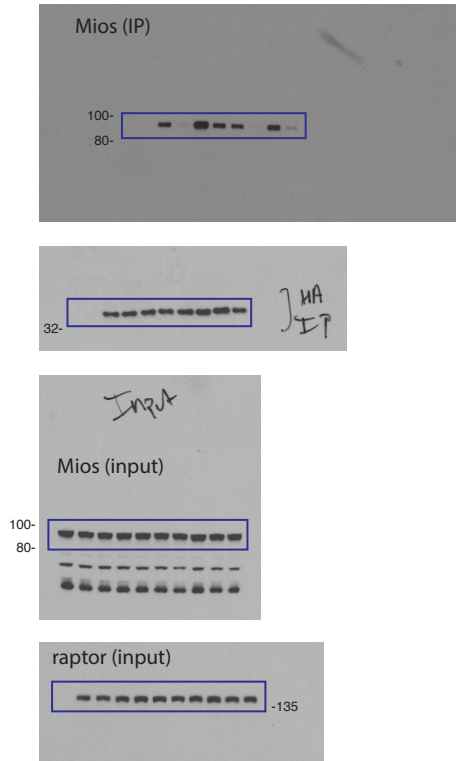

Extended Data Fig. 4d:

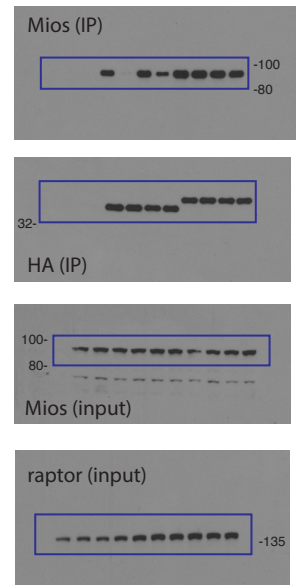

Extended Data Fig. 5b:

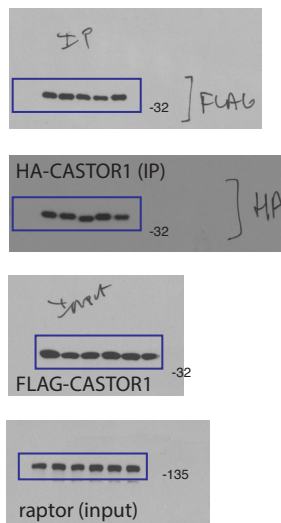

Supplement: NIHMS800609-supplement-supp_fig1.pdf [file NIHMS800609-supplement-supp_fig1.pdf]
